# Supplementary material for: Genome-wide identification and characterization of the bHLH gene family in tomato
Source: PubMed Central journal article supplement (PMC4312455; doi:10.1186/s12864-014-1209-2), 2015-01-22
Supplement: 12864_2014_1209_MOESM6_ESM.pdf [file 12864_2014_1209_MOESM6_ESM.pdf]

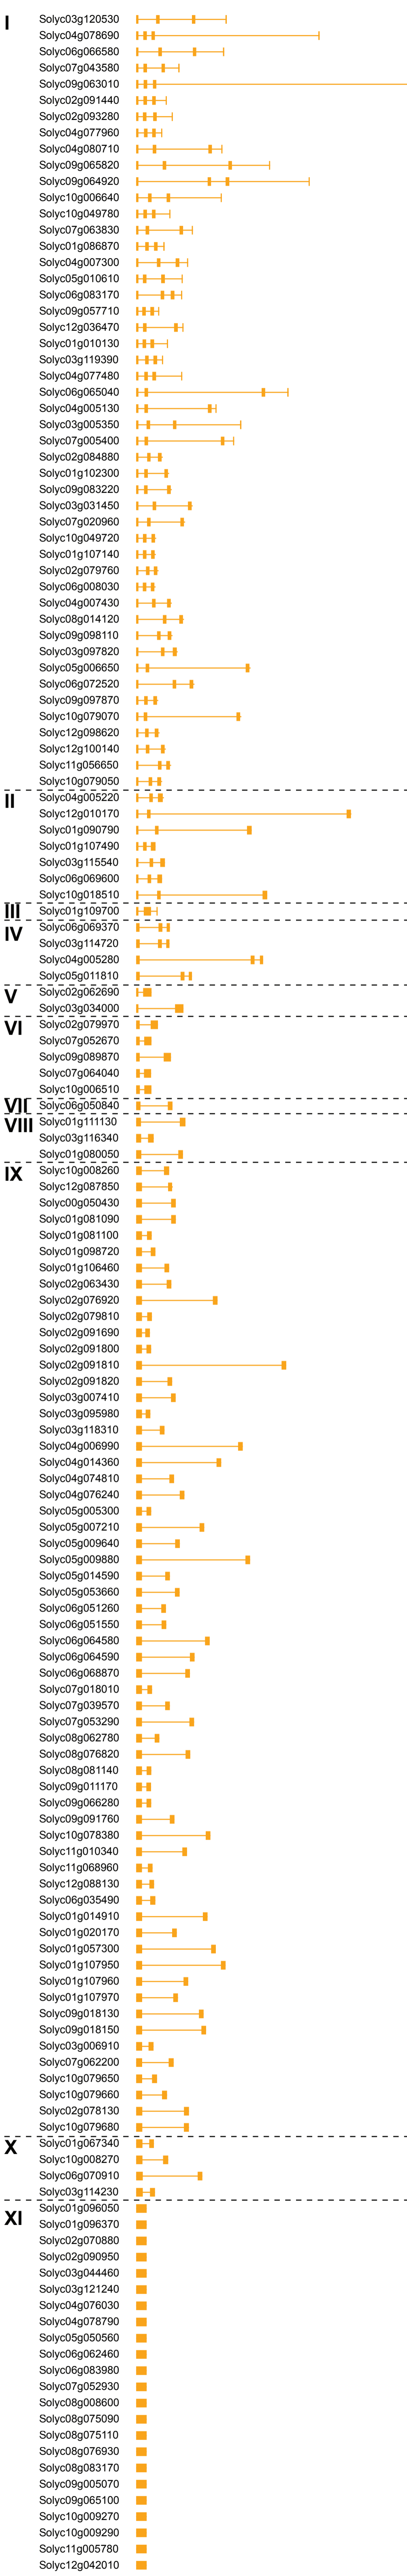

**Additional file 6. Intron distribution in the coding sequence of the bHLH domain of SibHLH genes**  
 The 11 different intron distribution patterns, which designated I to XI are named by the Figure 3. The bHLH domains (solid rectangles) are exon regions, and the thin lines are intron regions in the coding sequence of the bHLH domain for each gene.
