# Supplementary material for: Genome-wide identification and characterization of the bHLH gene family in tomato
Source: PubMed Central journal article supplement (PMC4312455; doi:10.1186/s12864-014-1209-2), 2015-01-22
Supplement: 12864_2014_1209_MOESM7_ESM.pdf [file 12864_2014_1209_MOESM7_ESM.pdf]

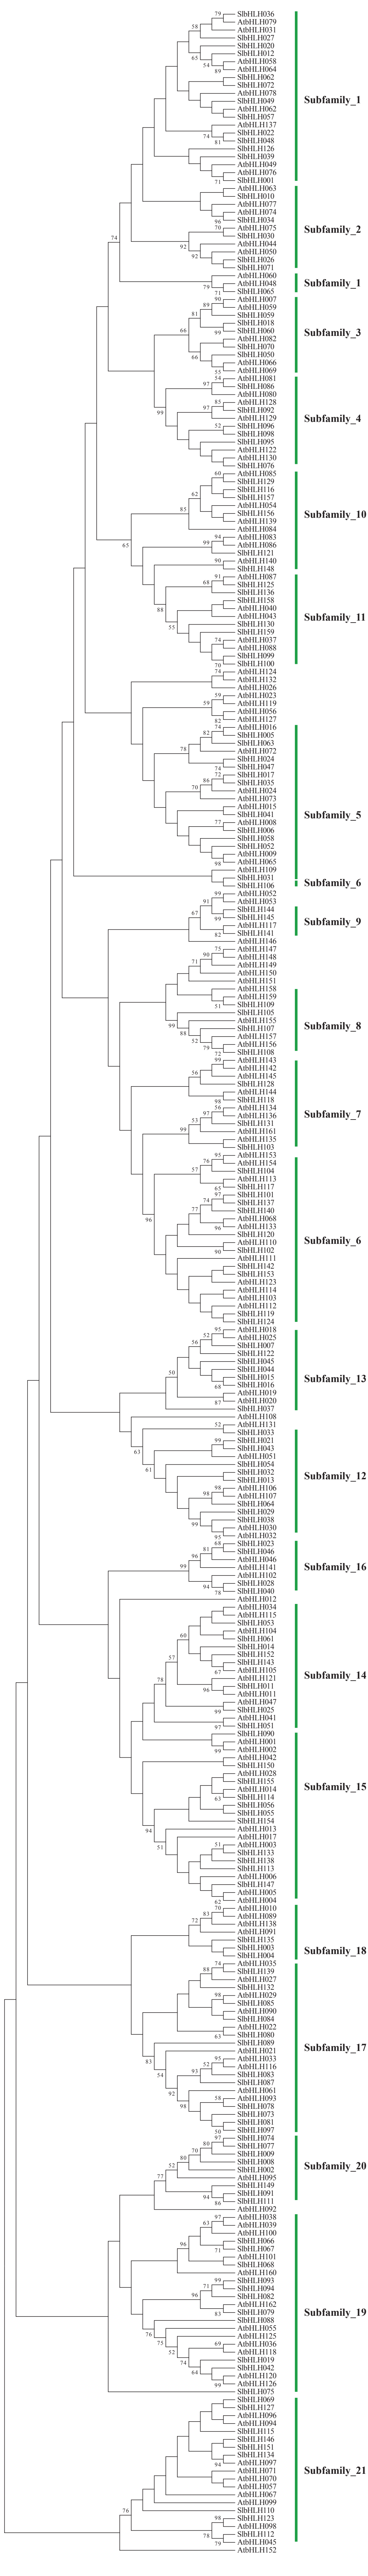

**Additional file 7. Neighbor-joining phylogenetic tree based on the bHLH domains of the AtbHLHs and SibHLHs**

The phylogenetic tree constructed using MEGA5. The protein name of *Arabidopsis thaliana* and tomato (*Solanum lycopersicum*) starts with "At" and "Sl", respectively. The bootstrap values are shown for each branch, which is supported by a bootstrap value of > 50% in the phylogenetic clades. The subfamily groups are defined by Figure 4.
