# Supplementary material for: Genome-wide identification and characterization of the bHLH gene family in tomato
Source: PubMed Central journal article supplement (PMC4312455; doi:10.1186/s12864-014-1209-2), 2015-01-22
Supplement: 12864_2014_1209_MOESM10_ESM.pdf [file 12864_2014_1209_MOESM10_ESM.pdf]

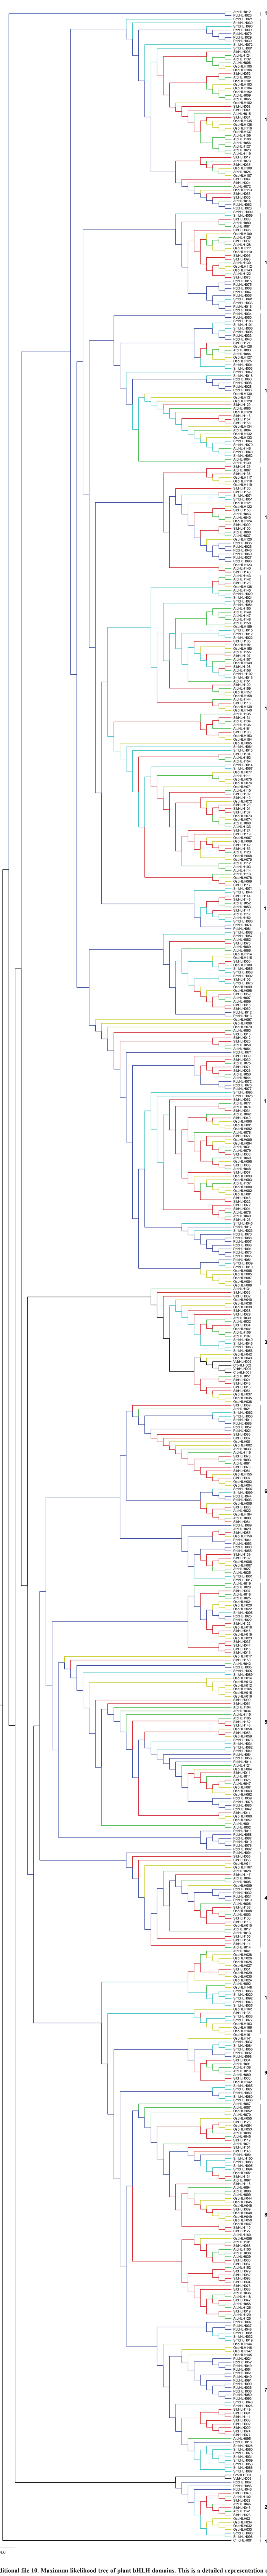

40

**Additional file 10. Maximum likelihood tree of plant bHLH domains. This is a detailed representation of the tree shown in Figure 7**

Colored lines symbolize the species to which the proteins in each group belong (yellow: *Oryza sativa* [monocot]; red: *Solanum lycopersicum* [eudicot]; green: *Arabidopsis thaliana* [eudicot]; light-blue: *Solanum lycopersicum* [eudicot]; dark-blue: *Physcomitrella patens* [moss]; black: *Volvox carteri*, *Cyanidioschyzon merolae*, and *Cyanidioschyzon merolae* [chlorophytes and red algae]).
